# Supplementary material for: Metabolomic Characterization of a cf. Neolyngbya Cyanobacterium from the South China Sea Reveals Wenchangamide A, a Lipopeptide with In Vitro Apoptotic Potential in Colon Cancer Cells
Source: MDPI journal article supplement (doi:10.3390/md19070397), 2021-07-16
Supplement: s1 [file s1]

## Supplementary Materials

# Metabolomic Characterization of a cf. *Neolyngbya* Cyanobacterium from the South China Sea Reveals Wenchangamide A, a Lipopeptide with In Vitro Apoptotic Potential in Colon Cancer Cells

Lijian Ding <sup>1,2,†</sup>, Rinat Bar-Shalom <sup>3,†</sup>, Dikla Aharonovich <sup>2</sup>, Naoaki Kurisawa <sup>4</sup>, Gaurav Patial <sup>1</sup>, Shuang Li <sup>1</sup>, Shan He <sup>1</sup>, Xiaojun Yan <sup>1</sup>, Arihiro Iwasaki <sup>4,5</sup>, Kiyotake Suenaga <sup>4,5</sup>, Chengchong Zhu <sup>5</sup>, Haixi Luo <sup>5</sup>, Fuli Tian <sup>5</sup>, Fuad Fares <sup>3</sup>, C. Benjamin Naman <sup>1,5,\*</sup> and Tal Luzzatto-Knaan <sup>2,\*</sup>

<sup>1</sup> Li Dak Sum Yip Yio Chin Kenneth Li Marine Biopharmaceutical Research Center, Department of Marine Pharmacy, College of Food and Pharmaceutical Sciences, Ningbo University, Ningbo 315800, China;

<sup>2</sup> Department of Marine Biology, Leon H. Charney School of Marine Sciences, University of Haifa, Haifa 3498838, Israel;

<sup>3</sup> Department of Human Biology, Faculty of Life Sciences, University of Haifa, Haifa 31905, Israel;

<sup>4</sup> Department of Chemistry, Keio University, 3-14-1, Hiyoshi, Kohoku-ku, Yokohama, Kanagawa 223-8522, Japan;

<sup>5</sup> Key Laboratory of Medicinal and Edible Plant Resources of Hainan Province, Hainan Vocational University of Science and Technology, Haikou 571126, China;

\* Correspondence: bnaman@nbu.edu.cn (C.B.N.); tluzzatto@univ.haifa.ac.il (T.L.-K.)

† These authors contributed equally to the work.

## Table of Contents

|                                                                                                                                                                                 |    |
|---------------------------------------------------------------------------------------------------------------------------------------------------------------------------------|----|
| <b>Figure S1.</b> $^1\text{H}$ NMR spectrum of <b>1</b> in $\text{DMSO-}d_6$ .                                                                                                  | 3  |
| <b>Figure S2.</b> $^{13}\text{C}$ NMR spectrum of <b>1</b> in $\text{DMSO-}d_6$ .                                                                                               | 3  |
| <b>Figure S3.</b> $^{13}\text{C}$ DEPT135 NMR spectrum of <b>1</b> in $\text{DMSO-}d_6$ .                                                                                       | 4  |
| <b>Figure S4.</b> $^1\text{H-}^1\text{H}$ COSY NMR spectrum of <b>1</b> in $\text{DMSO-}d_6$ .                                                                                  | 4  |
| <b>Figure S5.</b> $^1\text{H-}^1\text{H}$ TOCSY NMR spectrum of <b>1</b> in $\text{DMSO-}d_6$ .                                                                                 | 5  |
| <b>Figure S6.</b> $^1\text{H-}^{13}\text{C}$ HSQC-TOCSY NMR spectrum of <b>1</b> in $\text{DMSO-}d_6$ .                                                                         | 5  |
| <b>Figure S7.</b> $^1\text{H-}^{13}\text{C}$ HSQC NMR spectrum of <b>1</b> in $\text{DMSO-}d_6$ .                                                                               | 6  |
| <b>Figure S8.</b> $^1\text{H-}^{13}\text{C}$ HMBC NMR spectrum of <b>1</b> in $\text{DMSO-}d_6$ .                                                                               | 6  |
| <b>Figure S9.</b> $^1\text{H-}^{13}\text{C}$ HMBC NMR spectrum of <b>1</b> in $\text{DMSO-}d_6$ (expanded ester carbonyl region).                                               | 7  |
| <b>Figure S10.</b> $^1\text{H-}^1\text{H}$ ROESY NMR spectrum of <b>1</b> in $\text{DMSO-}d_6$ .                                                                                | 7  |
| <b>Table S1.</b> $^1\text{H}$ and $^{13}\text{C}$ NMR Spectroscopic Data for <b>1</b> in pyridine- $d_5$ .                                                                      | 8  |
| <b>Figure S11.</b> UV spectrum of <b>1</b> in MeOH at 0.25 mg/mL.                                                                                                               | 9  |
| <b>Figure S12.</b> IR spectrum of <b>1</b> in KBr.                                                                                                                              | 9  |
| <b>Figure S13.</b> HRESIMS/MS of <b>1</b> .                                                                                                                                     | 10 |
| <b>Figure S14.</b> HRESIMS/MS spectrum of <b>1</b> (expanded view $m/z$ 600-1200).                                                                                              | 10 |
| <b>Figure S15.</b> HRESIMS/MS spectrum of <b>1</b> (expanded view $m/z$ 0-600).                                                                                                 | 11 |
| <b>Figure S16.</b> MS/MS spectra of wenchangamide A ( <b>1</b> ; $m/z$ 1211) in C3-5 and wenchangamide B (proposed; $m/z$ 1297) in C3-7.                                        | 11 |
| <b>Figure S17.</b> Chiral HPLC analysis of hydrosylates of <b>1</b> (Ser).                                                                                                      | 12 |
| <b>Figure S18.</b> Chiral HPLC analysis of hydrosylates of <b>1</b> (Leu).                                                                                                      | 13 |
| <b>Figure S19.</b> Chiral HPLC analysis of hydrosylates of <b>1</b> (N-Me-Ile).                                                                                                 | 14 |
| <b>Figure S20.</b> Chiral HPLC analysis of hydrosylates of <b>1</b> (N-Me-Glu).                                                                                                 | 15 |
| <b>Figure S21.</b> Chiral HPLC analysis of hydrosylates of <b>1</b> (N-Me-Phe).                                                                                                 | 16 |
| <b>Figure S22.</b> Chiral HPLC analysis of hydrosylates of <b>1</b> (AMP).                                                                                                      | 17 |
| <b>Figure S23.</b> Bioactivity data used to guide fractionation of cf. <i>Neolynghya</i> sp. extract using HCT116 human colorectal cancer cell viability <i>in vitro</i> .      | 18 |
| <b>Figure S24.</b> The <i>in vitro</i> effect of C3, C3-5 (compound <b>1</b> ), and C3-7 on HCT116 cells viability, following 24 h of treatment with escalating concentrations. | 19 |
| <b>Figure S25.</b> The <i>in vitro</i> effect of C3-5 (compound <b>1</b> ) on HCT116 cells viability, following 8 h of treatment with escalating concentrations.                | 19 |
| <b>Weblink S1.</b> GNPS metabolomics data used to prepare main text Figure 4.                                                                                                   | 20 |
| <b>Weblink S2.</b> GNPS metabolomics data used to prepare main text Figure 9.                                                                                                   | 20 |
| <b>Sequence S1.</b> 16S rRNA gene V3-V4 amplicon used to prepare main text Figure 3C.                                                                                           | 20 |

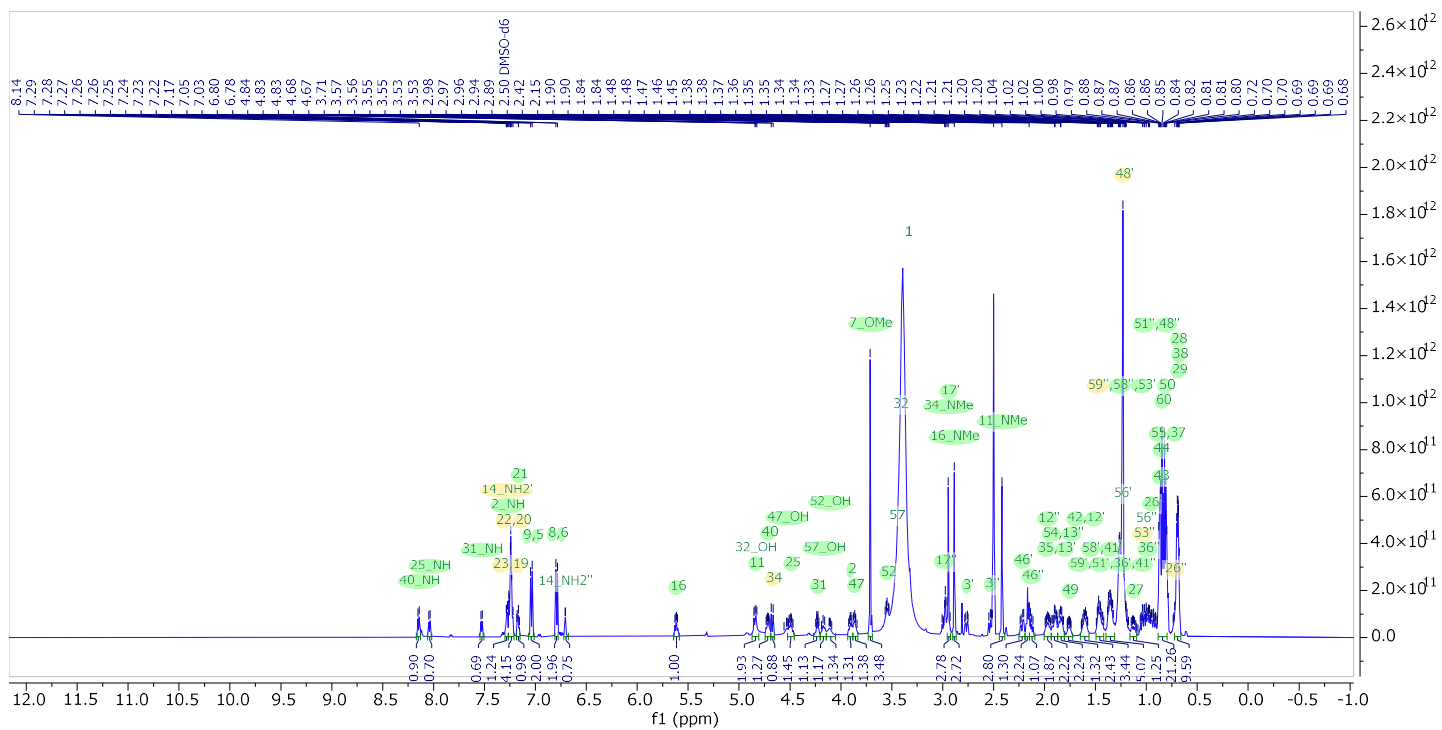

**Figure S1.** <sup>1</sup>H NMR spectrum of **1** in DMSO-*d*<sub>6</sub>.

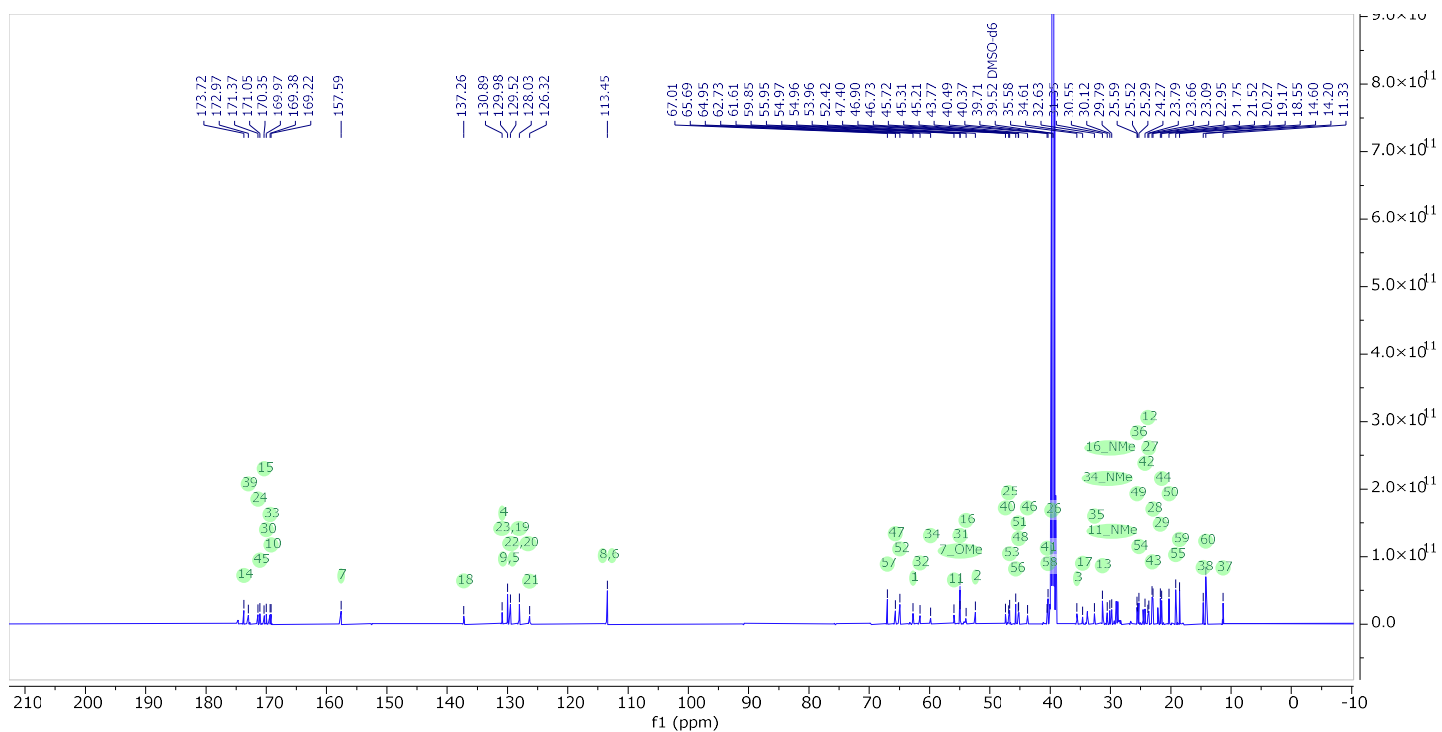

**Figure S2.** <sup>13</sup>C NMR spectrum of **1** in DMSO-*d*<sub>6</sub>.

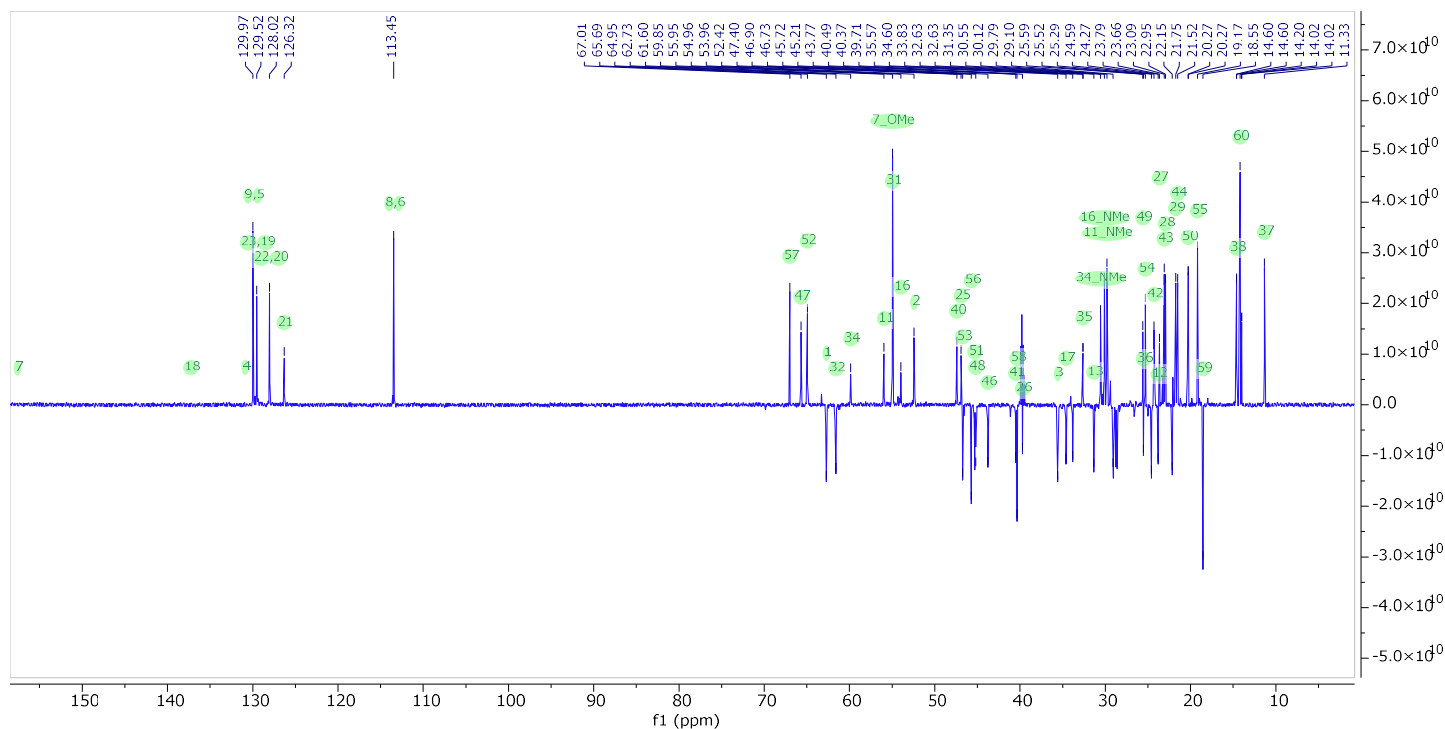

**Figure S3.**  $^{13}\text{C}$  DEPT135 NMR spectrum of **1** in  $\text{DMSO-}d_6$ .

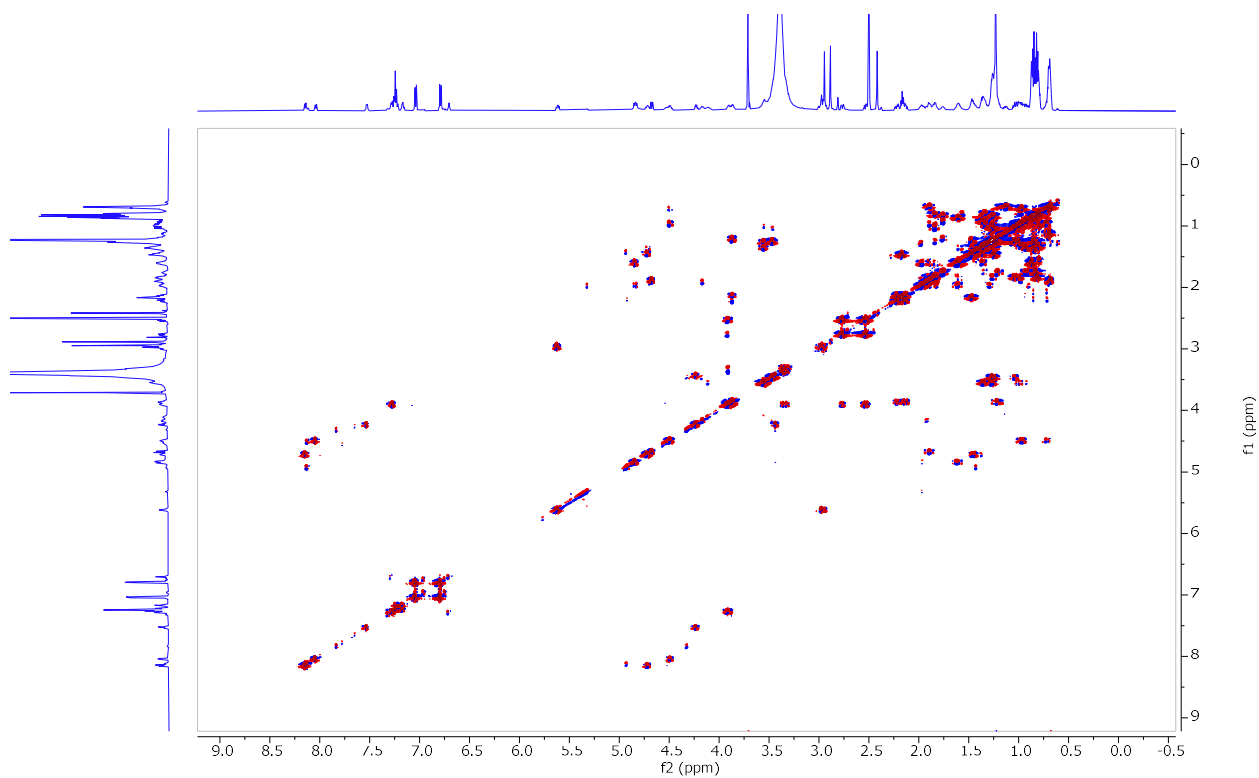

**Figure S4.**  $^1\text{H}$ - $^1\text{H}$  COSY NMR spectrum of **1** in  $\text{DMSO-}d_6$ .

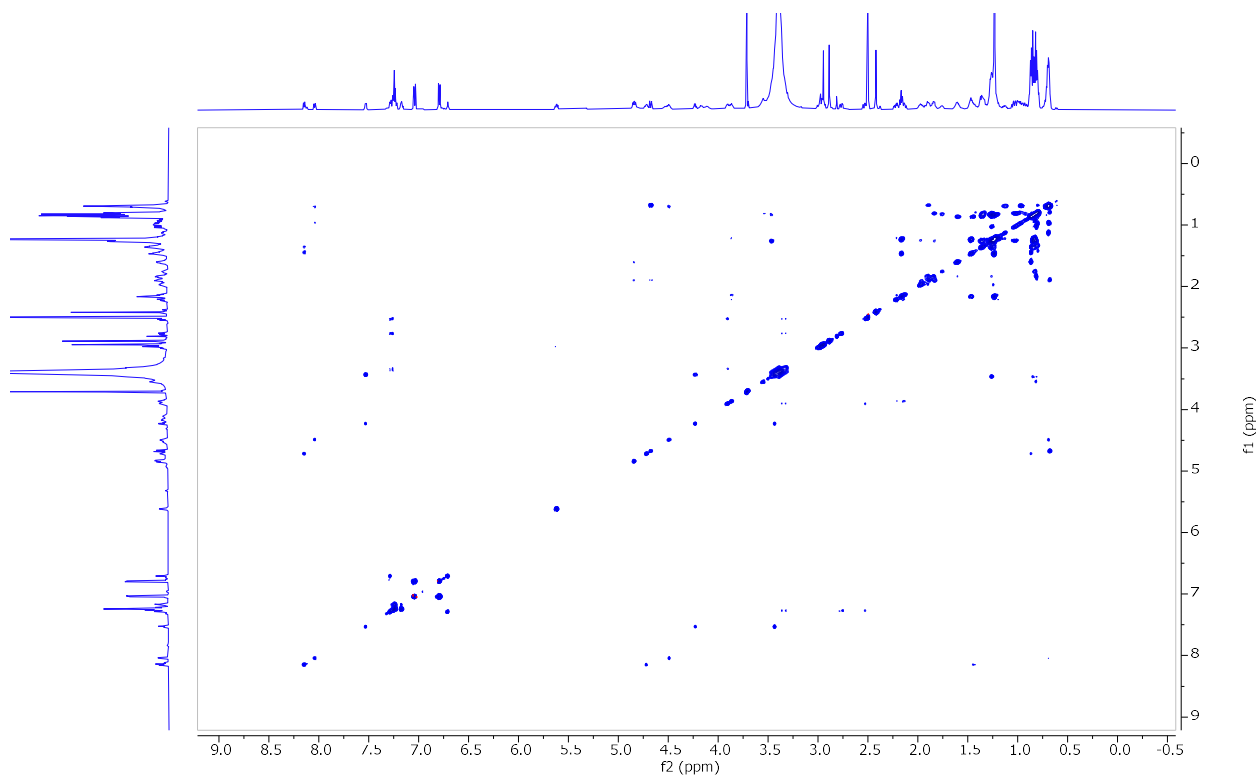

**Figure S5.**  $^1\text{H}$ - $^1\text{H}$  TOCSY NMR spectrum of **1** in  $\text{DMSO-}d_6$ .

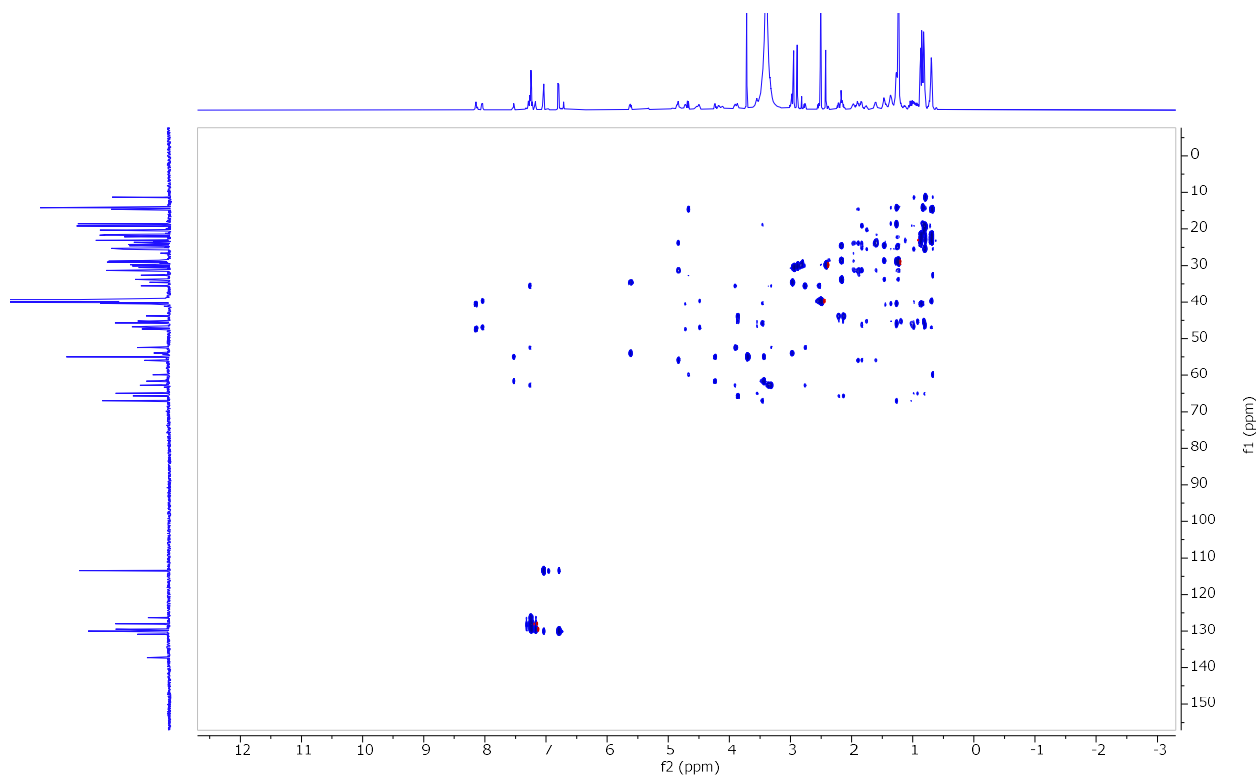

**Figure S6.**  $^1\text{H}$ - $^{13}\text{C}$  HSQC-TOCSY NMR spectrum of **1** in  $\text{DMSO-}d_6$ .

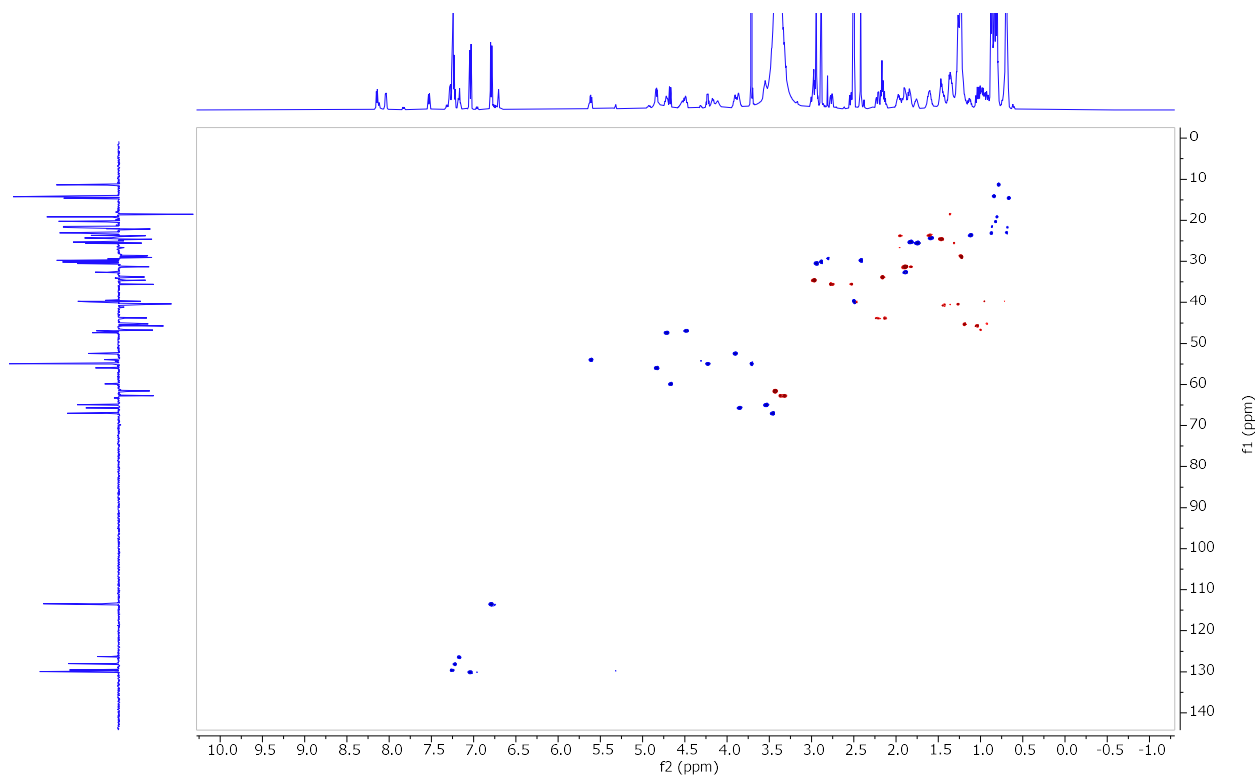

**Figure S7.**  $^1\text{H}$ - $^{13}\text{C}$  HSQC NMR spectrum of **1** in  $\text{DMSO-}d_6$ .

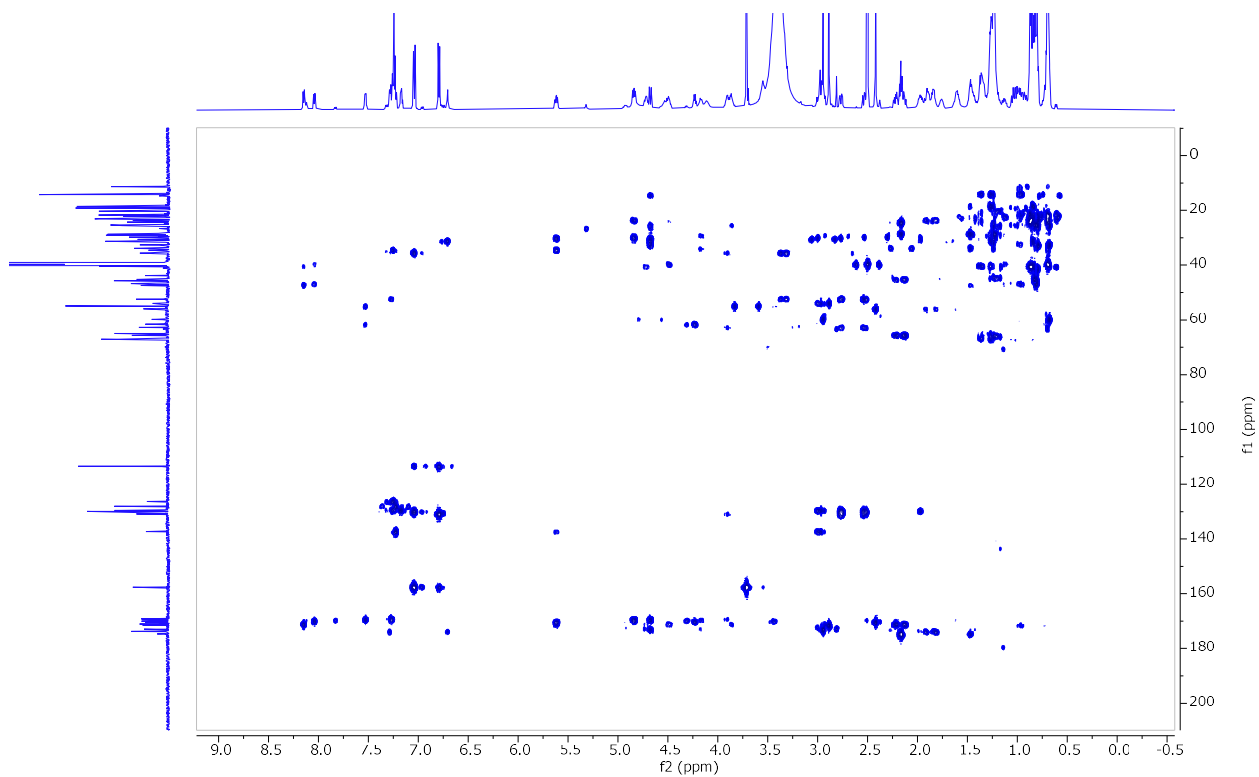

**Figure S8.**  $^1\text{H}$ - $^{13}\text{C}$  HMBC NMR spectrum of **1** in  $\text{DMSO-}d_6$ .

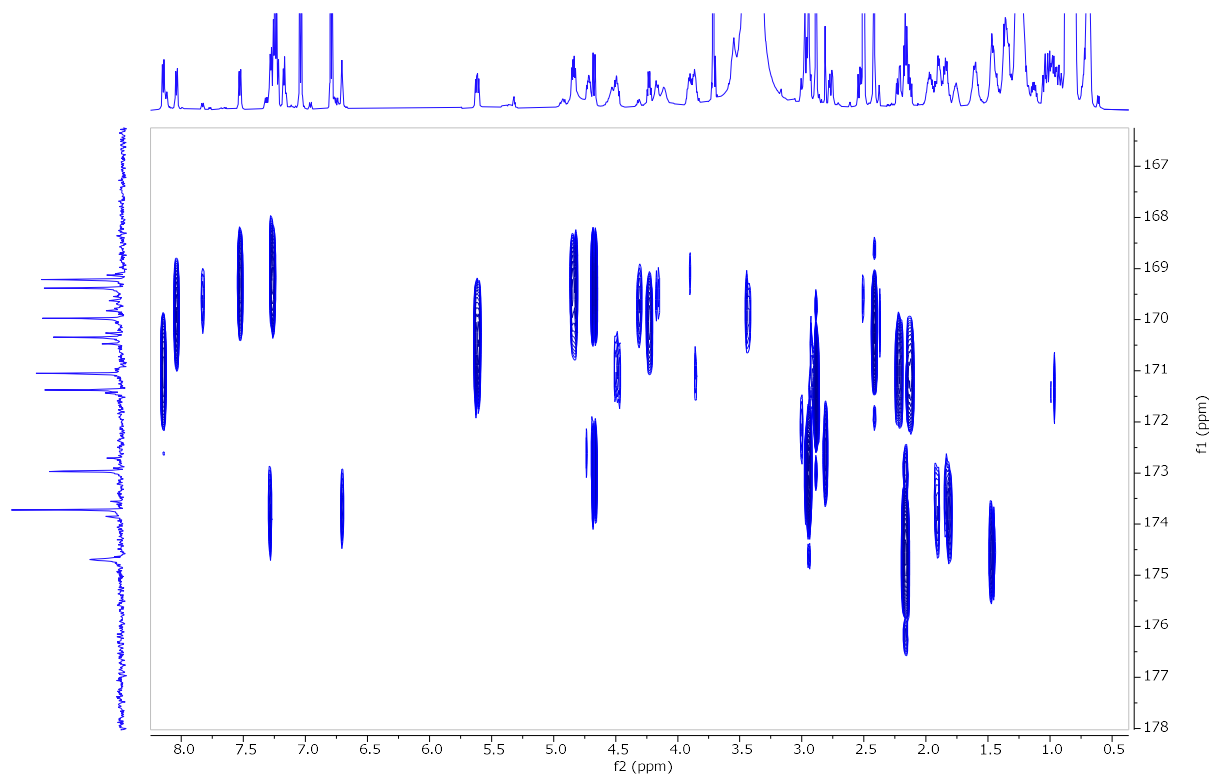

**Figure S9.**  $^1\text{H}$ - $^{13}\text{C}$  HMBC NMR spectrum of **1** in  $\text{DMSO-}d_6$  (expanded ester carbonyl region).

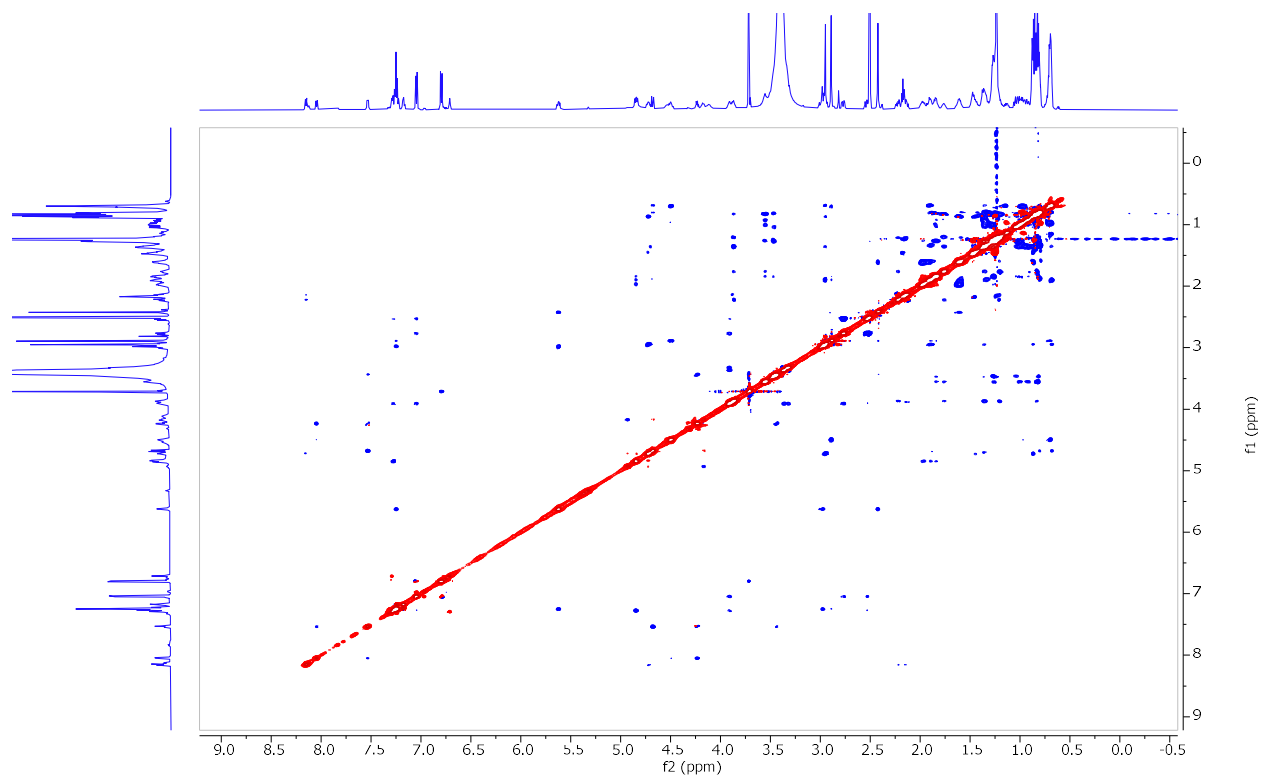

**Figure S10.**  $^1\text{H}$ - $^1\text{H}$  ROESY NMR spectrum of **1** in  $\text{DMSO-}d_6$ .

**Table S1.** <sup>1</sup>H and <sup>13</sup>C NMR Spectroscopic Data for **1** in pyridine-*d*<sub>5</sub><sup>a,b</sup>

| Moiety           | Position           | δ <sub>C</sub> | Type            | δ <sub>H</sub> , mult ( <i>J</i> in Hz)       | Moiety           | Position         | δ <sub>C</sub> | Type            | δ <sub>H</sub> , mult ( <i>J</i> in Hz)      |
|------------------|--------------------|----------------|-----------------|-----------------------------------------------|------------------|------------------|----------------|-----------------|----------------------------------------------|
| AMP              | 1                  | 63.6           | CH <sub>2</sub> | 3.92, m                                       | <i>N</i> -Me-Ile | 33               | 170.0          | C               |                                              |
|                  | 2                  | 53.2           | CH              | 4.65, m                                       |                  | 34               | 61.2           | CH              | 5.24 d (10.6)                                |
|                  | 3                  | 36.7           | CH <sub>2</sub> | 2.77, dd (13.9, 5.8);<br>2.53, dd (13.9, 8.8) |                  | 35               | 32.7           | CH              | 2.23, m                                      |
|                  | 4                  | 131.4          | C               |                                               |                  | 36               | 26.9           | CH <sub>2</sub> | 1.67, m; 1.01, m                             |
|                  | 5, 9               | 130.7          | CH              | 7.04, d (8.5)                                 |                  | 37               | 11.6           | CH <sub>3</sub> | 0.81, t (7.2)                                |
|                  | 6, 8               | 114.3          | CH              | 6.79, d (8.5)                                 |                  | 38               | 14.9           | CH <sub>3</sub> | 0.79, d (6.5)                                |
|                  | 7                  | 158.7          | C               |                                               |                  | 34- <i>N</i> -Me | 31.3           | CH <sub>3</sub> | 3.26, s                                      |
|                  | 7- <i>O</i> -Me    | 55.3c          | CH <sub>3</sub> | 3.71, s                                       | Leu-2            | 39               | 171.5          | C               |                                              |
| <i>N</i> -Me-Gln | 2-NH               |                |                 | 7.85, d (8.8)                                 |                  | 40               | 48.7           | CH              | 5.22, m                                      |
|                  | 10                 | 170.8          | C               |                                               |                  | 41               | 41.4           | CH <sub>2</sub> | 1.81, m                                      |
|                  | 11                 | 57.3           | CH              | 5.49, dd (11.7, 4.3)                          |                  | 42               | 25.2           | CH              | 1.87, m                                      |
|                  | 12                 | 24.9           | CH <sub>2</sub> | 2.67, m; 2.51, m                              |                  | 43               | 23.0           | CH <sub>3</sub> | 0.87, d (6.3)                                |
|                  | 13                 | 32.5           | CH <sub>2</sub> | 2.53, m; 2.33, m                              |                  | 44               | 22.4           | CH <sub>3</sub> | 0.94, d (6.1)                                |
|                  | 14                 | 176.1          | C               |                                               |                  | 40-NH            |                |                 | 9.28, d (7.2)                                |
|                  | 14-NH <sub>2</sub> |                |                 | 8.26, m; 7.52, m                              | FA               | 45               | 173.4          | C               |                                              |
|                  | 11- <i>N</i> -Me   | 30.8           | CH <sub>3</sub> | 3.10, s                                       |                  | 46               | 44.5           | CH <sub>2</sub> | 2.81, dd (13.7, 3.6)<br>2.76, dd (13.7, 8.3) |
| <i>N</i> -Me-Phe | 15                 | 172.0          | C               |                                               |                  | 47               | 66.8           | CH              | 4.63, m                                      |
|                  | 16                 | 54.6           | CH              | 6.15, dd (10.1, 6.1)                          |                  | 48               | 46.6           | CH <sub>2</sub> | 1.81, m; 1.67, m                             |
|                  | 17                 | 35.6           | CH <sub>2</sub> | 3.29, dd (13.9, 6.1)<br>3.20, dd (13.9, 10.1) |                  | 49               | 26.8           | CH              | 2.41, m                                      |
|                  | 18                 | 138.0          | C               |                                               |                  | 50               | 20.6           | CH <sub>3</sub> | 1.10, d (6.5)                                |
|                  | 19, 23             | 130.3          | CH              | 7.37, d (7.2)                                 |                  | 51               | 46.2           | CH <sub>2</sub> | 1.91, m; 1.29, m                             |
|                  | 20, 22             | 128.7          | CH              | 7.27, dd (7.4, 7.2)                           |                  | 52               | 66.5           | CH              | 4.13, m                                      |
|                  | 21                 | 126.9          | CH              | 7.17, t (7.4)                                 |                  | 53               | 46.9           | CH <sub>2</sub> | 1.78, m; 1.36, m                             |
|                  | 16- <i>N</i> -Me   | 30.7           | CH <sub>3</sub> | 3.25, s                                       |                  | 54               | 26.6           | CH              | 2.57, m                                      |
| Leu-1            | 24                 | 172.7          | C               |                                               |                  | 55               | 19.6           | CH <sub>3</sub> | 1.11, d (6.5)                                |
|                  | 25                 | 47.9           | CH              | 5.03, m                                       |                  | 56               | 48.0           | CH <sub>2</sub> | 1.76 m; 1.37 m                               |
|                  | 26                 | 40.4           | CH <sub>2</sub> | 1.37, m; 1.07, m                              |                  | 57               | 68.5           | CH              | 3.97, m                                      |
|                  | 27                 | 24.5           | CH              | 1.20, m                                       |                  | 58               | 41.6           | CH <sub>2</sub> | 1.65, m; 1.55, m                             |
|                  | 28                 | 22.9           | CH <sub>3</sub> | 0.63, d (6.5)                                 |                  | 59               | 19.6           | CH <sub>2</sub> | 1.66, m; 1.51, m                             |
|                  | 29                 | 22.4           | CH <sub>3</sub> | 0.70, d (6.5)                                 |                  | 60               | 14.6           | CH <sub>2</sub> | 0.92, t (7.0)                                |
|                  | 25-NH              |                |                 | 9.83, d (7.9)                                 |                  | 47-OH            |                |                 | 6.48, d (4.7)                                |
|                  |                    |                |                 |                                               |                  | 52-OH            |                |                 | 5.64, d (5.8)                                |
| Ser              | 30                 | 171.7          | C               |                                               |                  | 57-OH            |                |                 | 5.69, d (5.8)                                |
|                  | 31                 | 55.6c          | CH              | 5.17, m                                       |                  |                  |                |                 |                                              |
|                  | 32                 | 63.0           | CH <sub>2</sub> | 4.14, m; 4.07, m                              |                  |                  |                |                 |                                              |
|                  | 31-NH              |                |                 | 7.86, d (8.8)                                 |                  |                  |                |                 |                                              |
|                  | 32-OH              |                |                 | 6.17, m                                       |                  |                  |                |                 |                                              |

<sup>a</sup>Data recorded at 298 K, 600 MHz (<sup>1</sup>H) and 150 MHz (<sup>13</sup>C). <sup>b</sup>Assignments supported by 2D NMR.



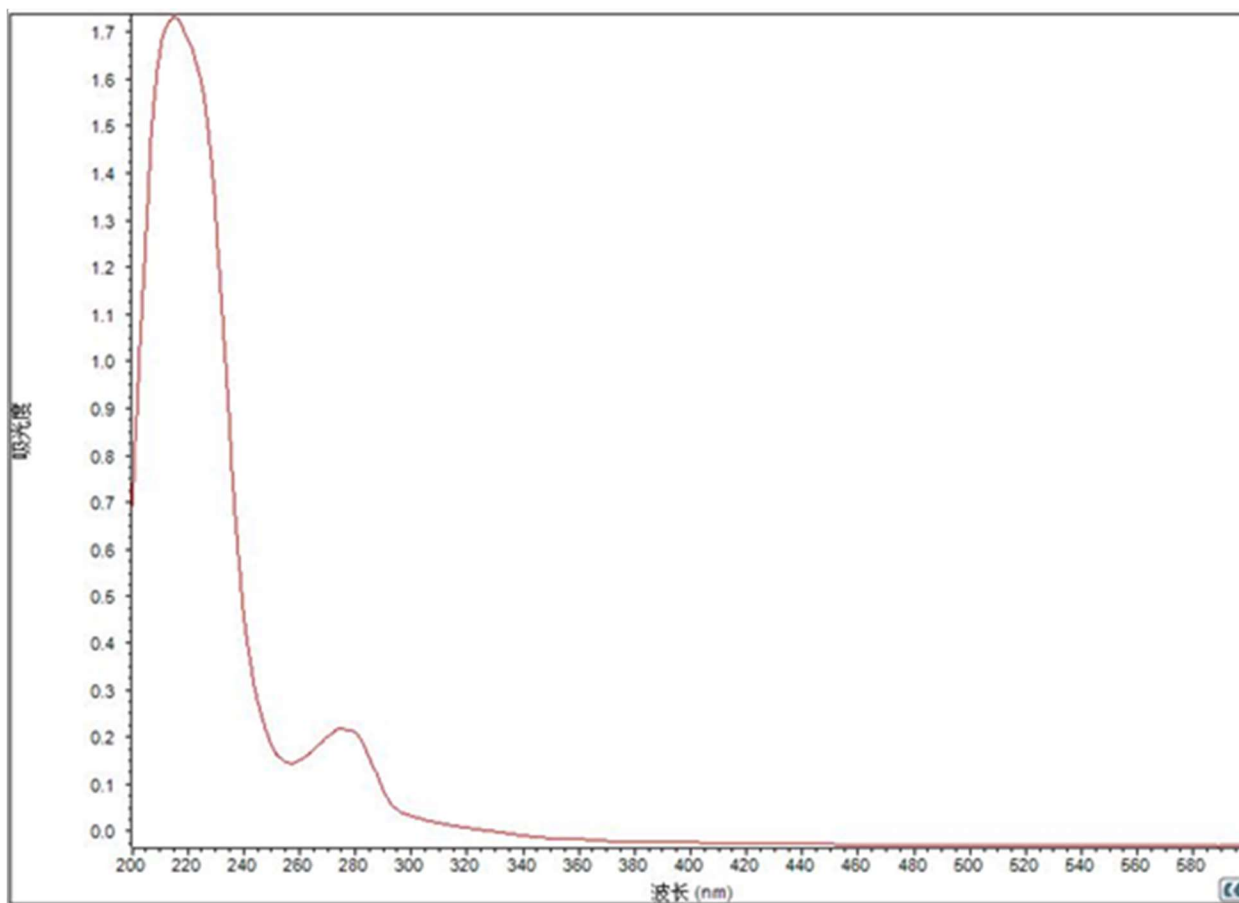

Figure S11. UV spectrum of **1** in MeOH at 0.25 mg/mL.

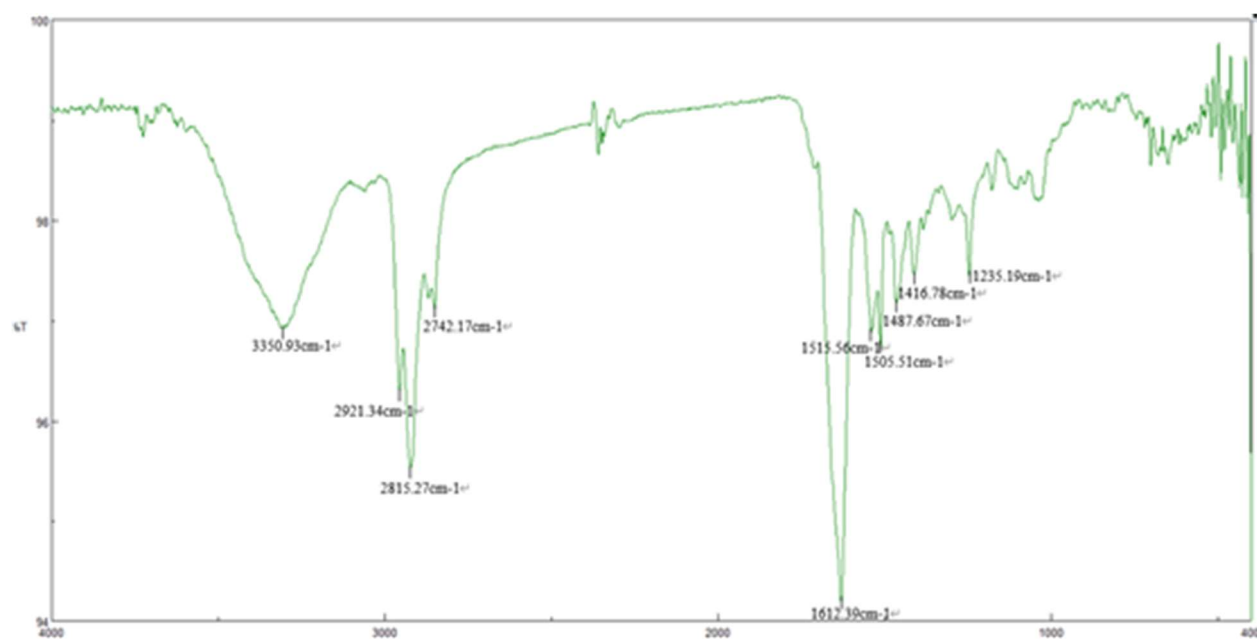

Figure S12. IR spectrum of **1** in KBr.

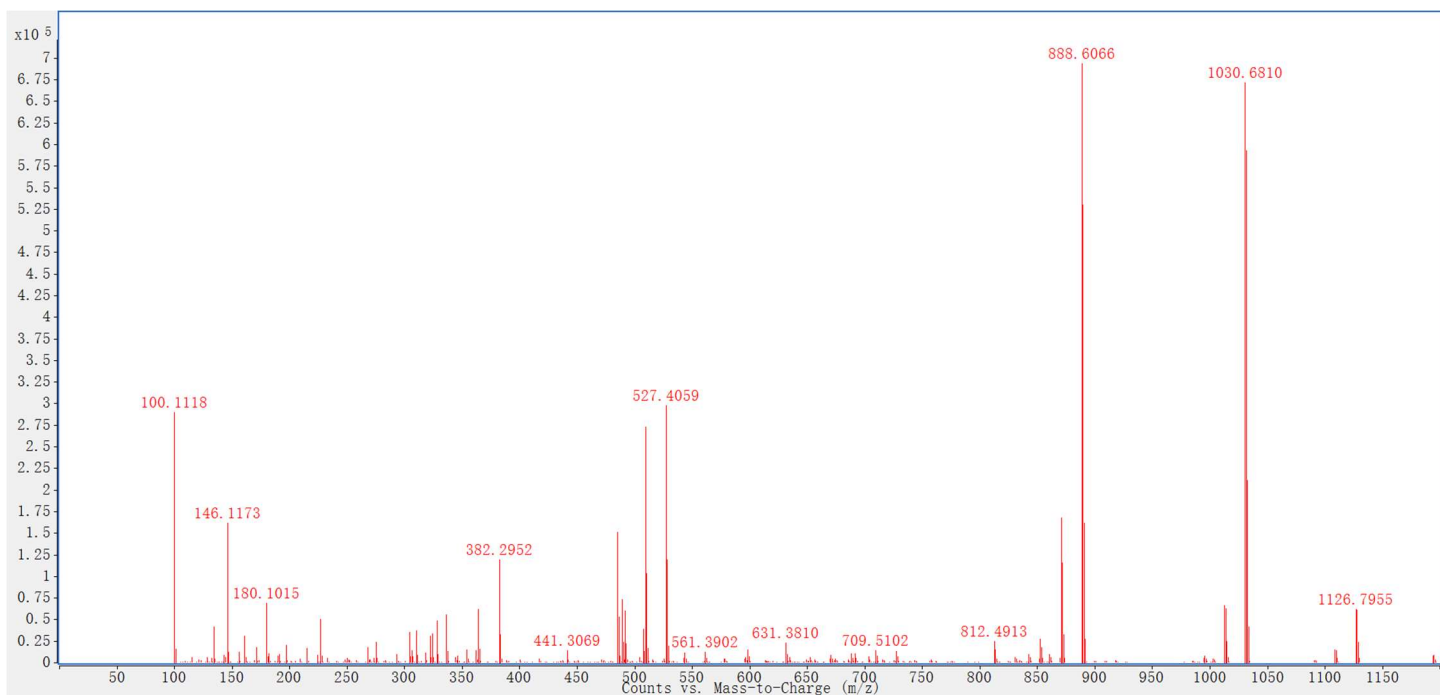

**Figure S13.** HRESIMS/MS of **1**.

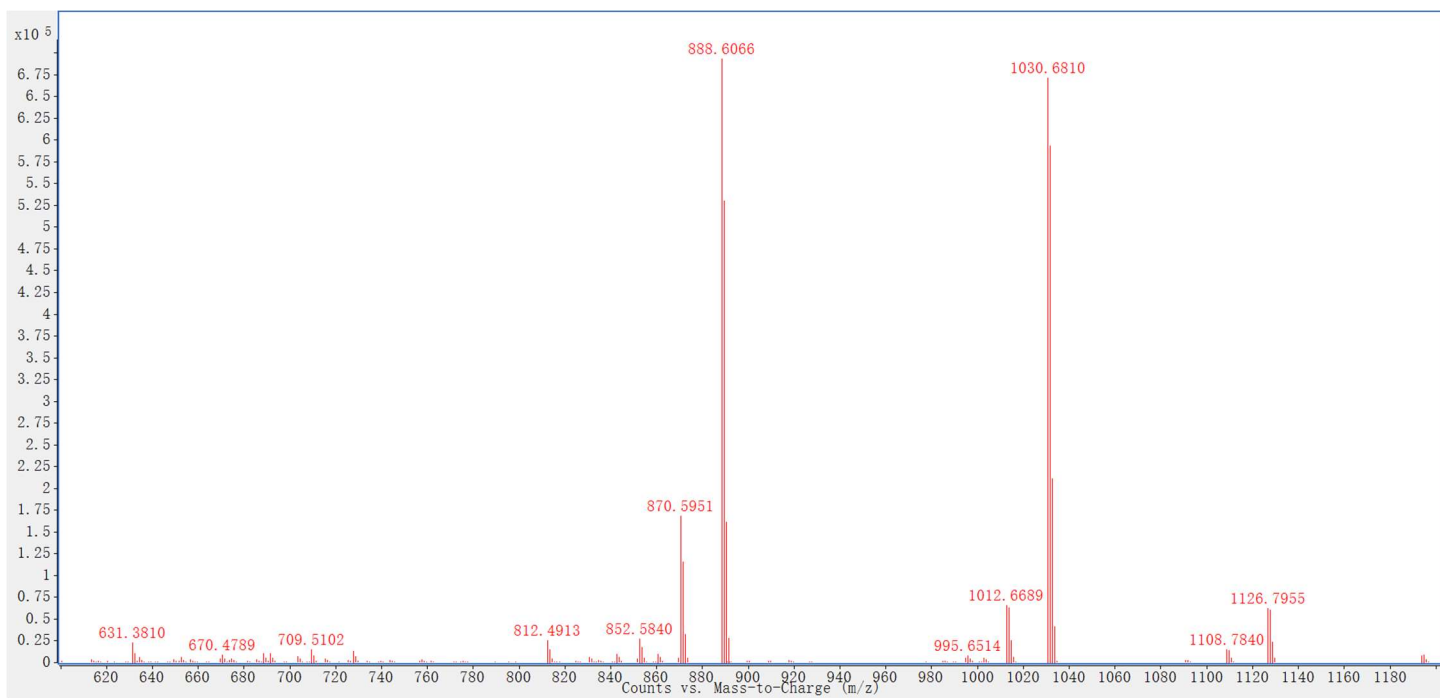

**Figure S14.** HRESIMS/MS spectrum of **1** (expanded view  $m/z$  600-1200).

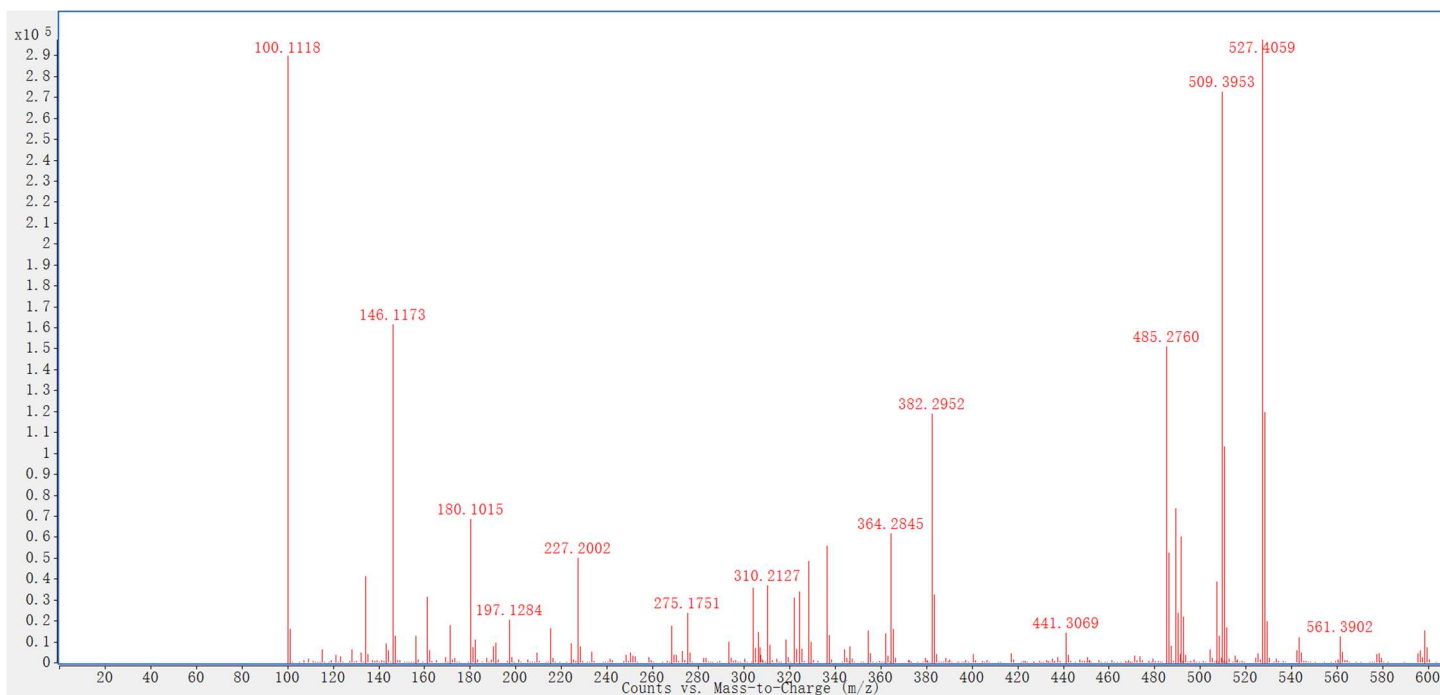

Figure S15. HRESIMS/MS spectrum of **1** (expanded view  $m/z$  0-600).

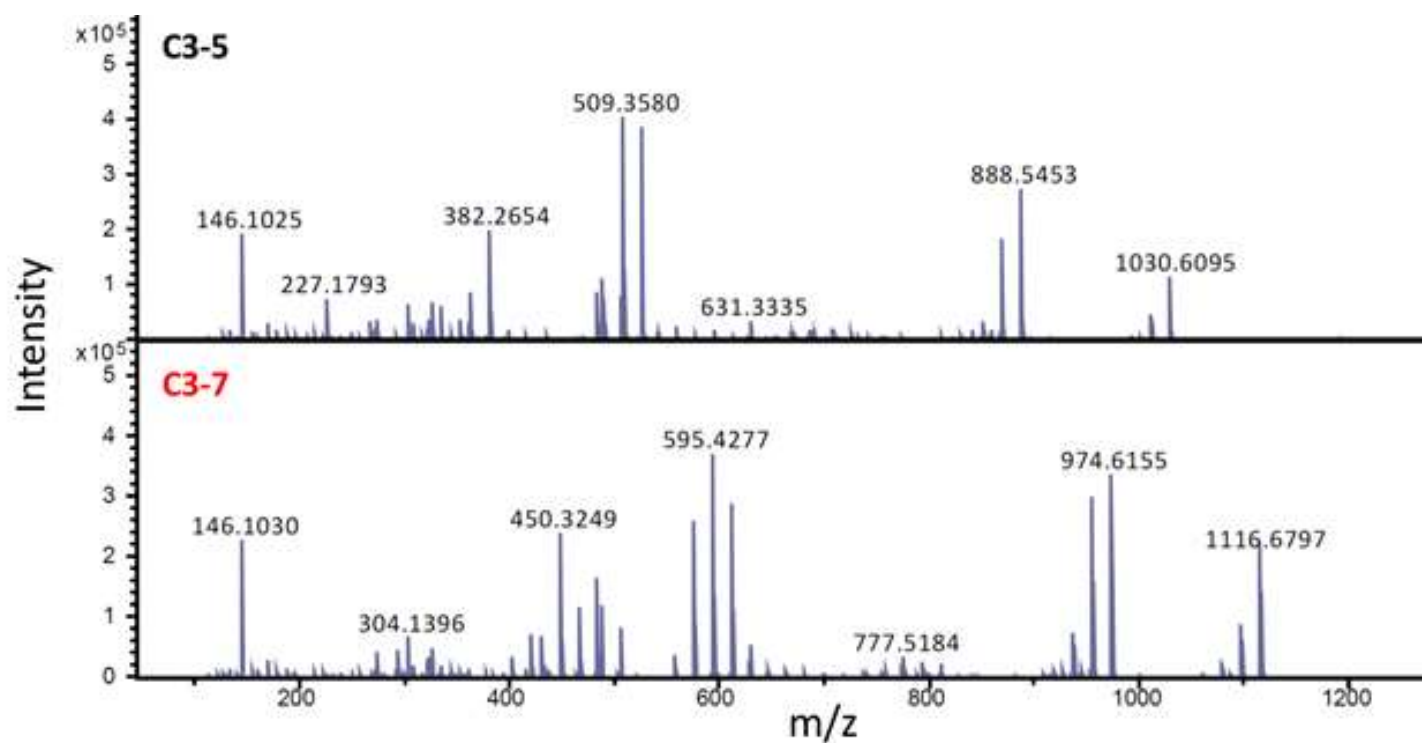

Figure S16. MS/MS spectra of wenchangamide A (**1**;  $m/z$  1211) in C3-5 and wenchangamide B (proposed;  $m/z$  1297) in C3-7.

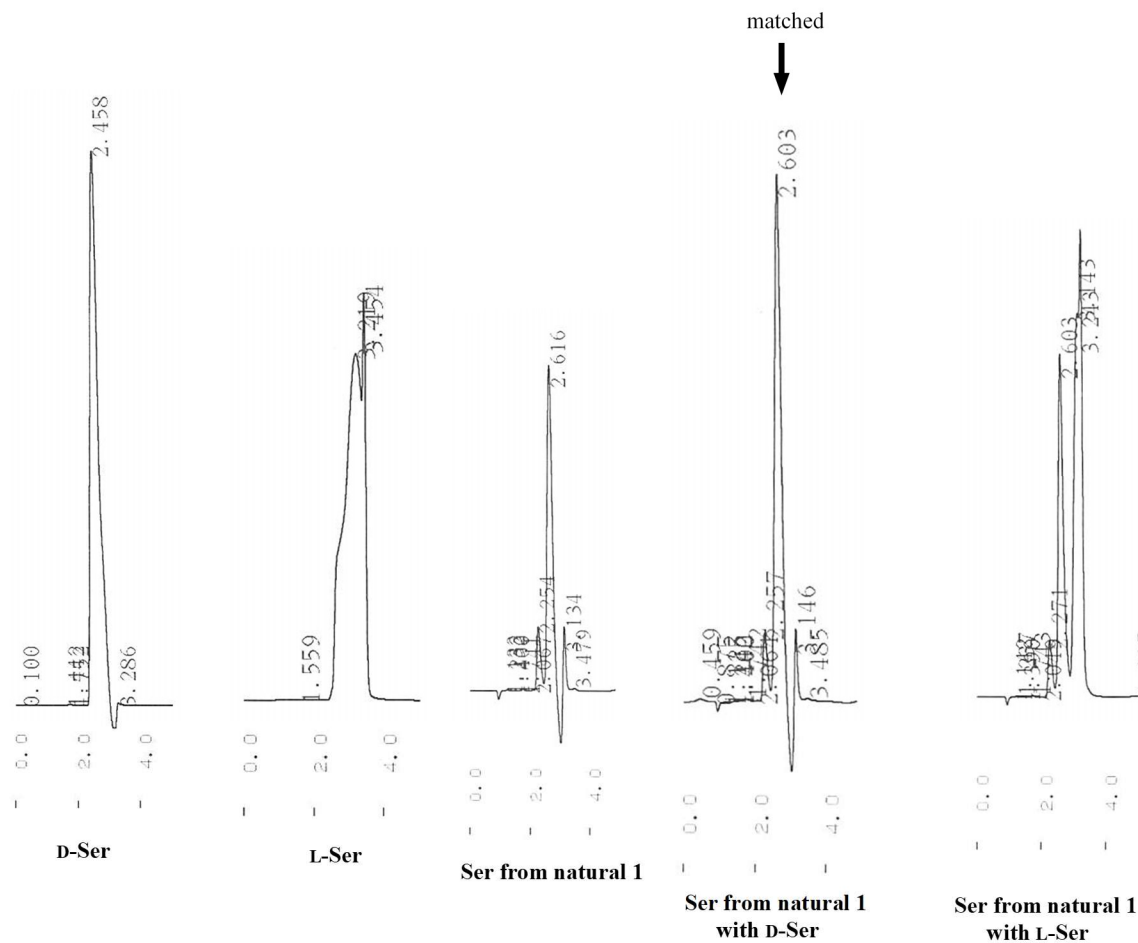

**Figure S17.** Chiral HPLC analysis of hydrosylates of **1** (Ser).

Ser: column, DAICEL CHIRALPAK MA(+) ( 4.6 × 50 mm × 2 in series); flow rate 1 mL/min; detection, UV 254 nm; solvent 2.0 mM CuSO<sub>4</sub>

*t<sub>R</sub>* (min): Authentic samples D-Ser (2.5), L-Ser (3.2)

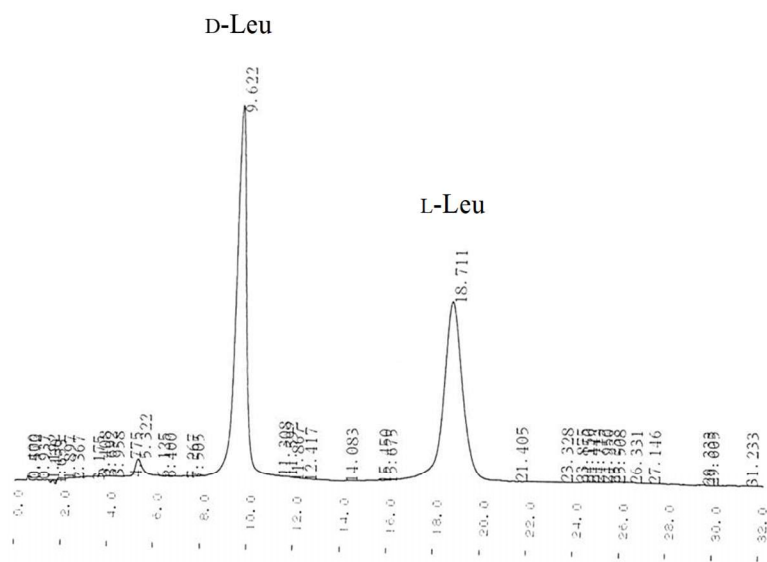

Leu standards

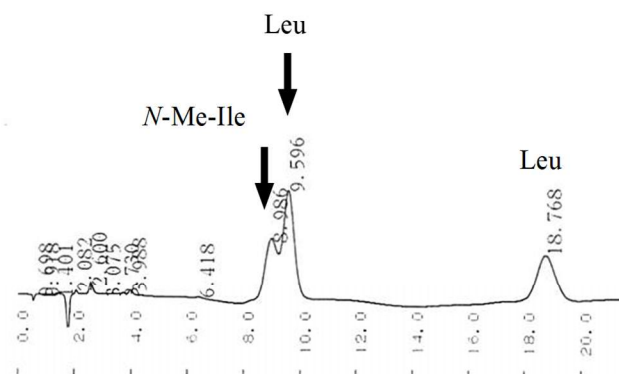

Leu and N-Me-Ile from 1

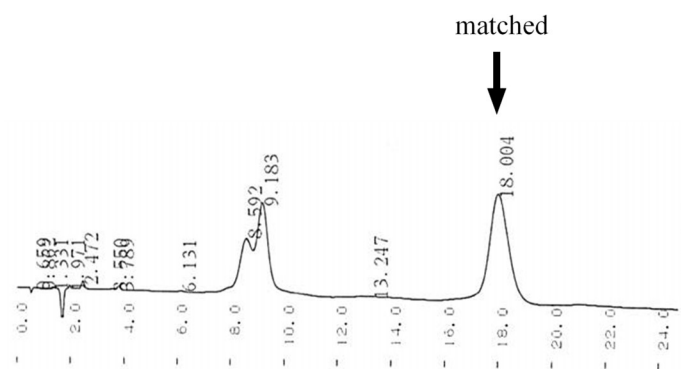

Leu and N-Me-Ile from 1  
with L-Leu

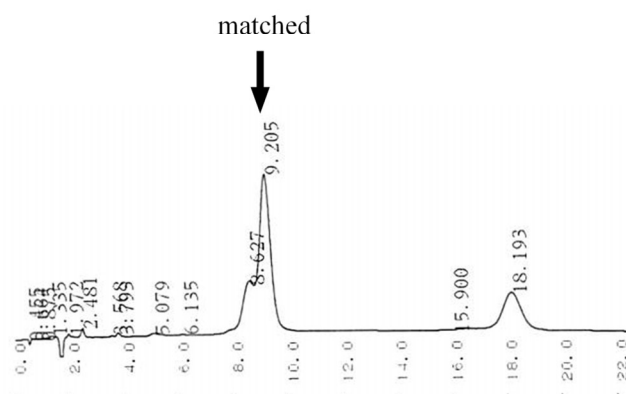

Leu and N-Me-Ile from 1  
with D-Leu

**Figure S18.** Chiral HPLC analysis of hydrosylates of **1** (Leu).

Leu: column, DAICEL CHIRALPAK MA(+) ( 4.6 × 50 mm); flow rate 1 mL/min; detection, UV 254 nm; solvent 2.0 mM CuSO<sub>4</sub>

*t<sub>R</sub>* (min): Authentic samples D-Leu (9.6), L-Leu (18.7)

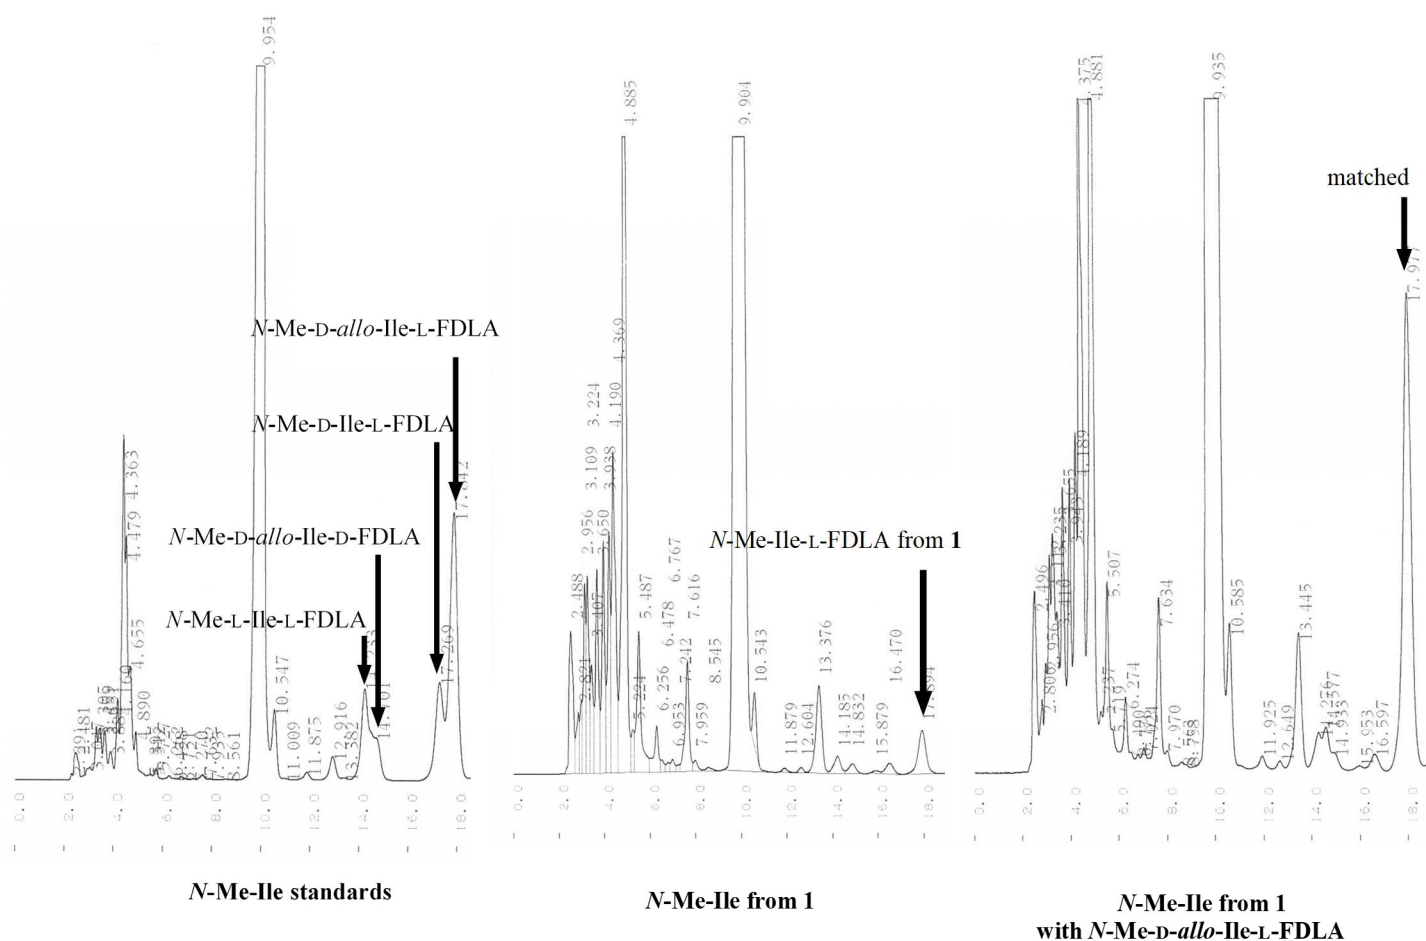

**Figure S19.** Chiral HPLC analysis of hydrosylates of **1** (N-Me-Ile).

N-Me-Ile: column, Cosmosil PBr ( 4.6 × 250 mm); flow rate 1 mL/min; detection, UV 340 nm; solvent 55% MeCN, 0.1% TFA

$t_R$  (min): Authentic samples *N-Me-L-Ile-L-FDLA* (14.2), *N-Me-D-Ile-L-FDLA* (17.3), *N-Me-D-allo-Ile-D-FDLA* (14.7), *N-Me-D-allo-Ile-L-FDLA* (17.8)

*N-Me-D-allo-Ile-D-FDLA* was used as a substitute of *N-Me-L-allo-Ile-L-FDLA*

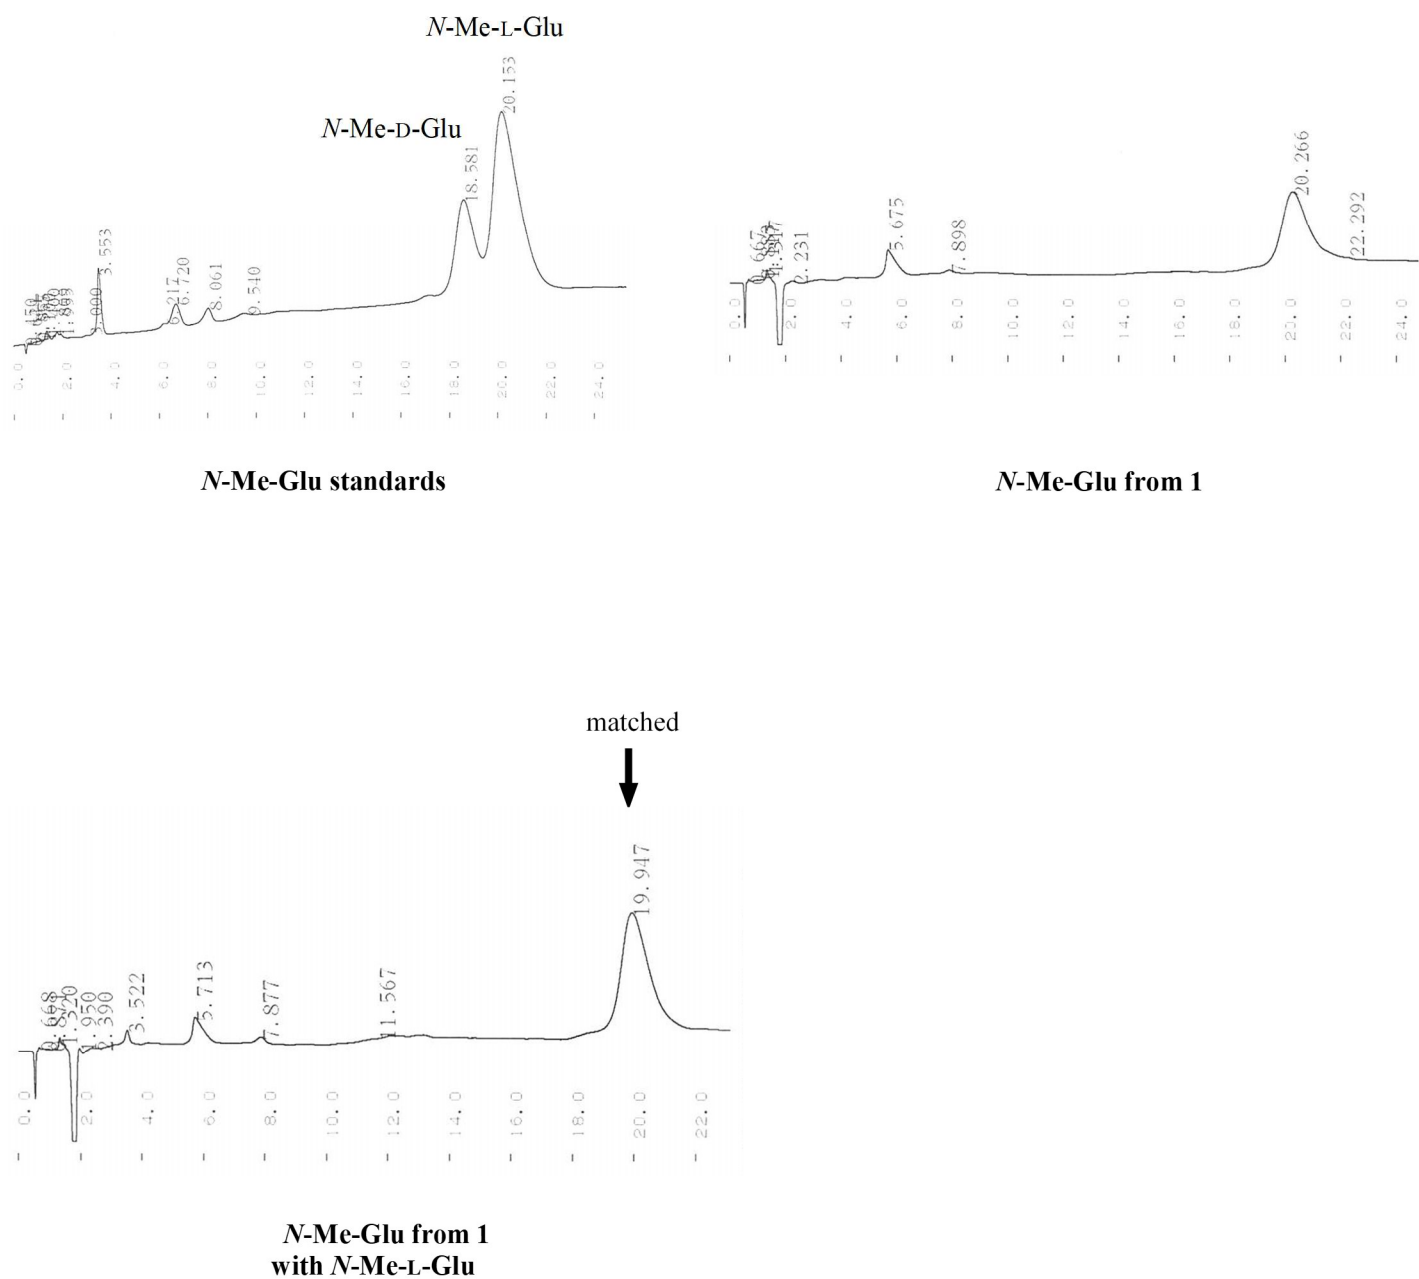

**Figure S20.** Chiral HPLC analysis of hydrosylates of **1** (N-Me-Glu).

N-Me-Glu: column, DAICEL CHIRALPAK MA(+) ( 4.6 × 50 mm); flow rate 1 mL/min; detection, UV 254 nm; solvent 2.0 mM CuSO<sub>4</sub>

*t<sub>R</sub>* (min): Authentic samples N-Me-D-Glu (18.6), N-Me-L-Glu (20.2)

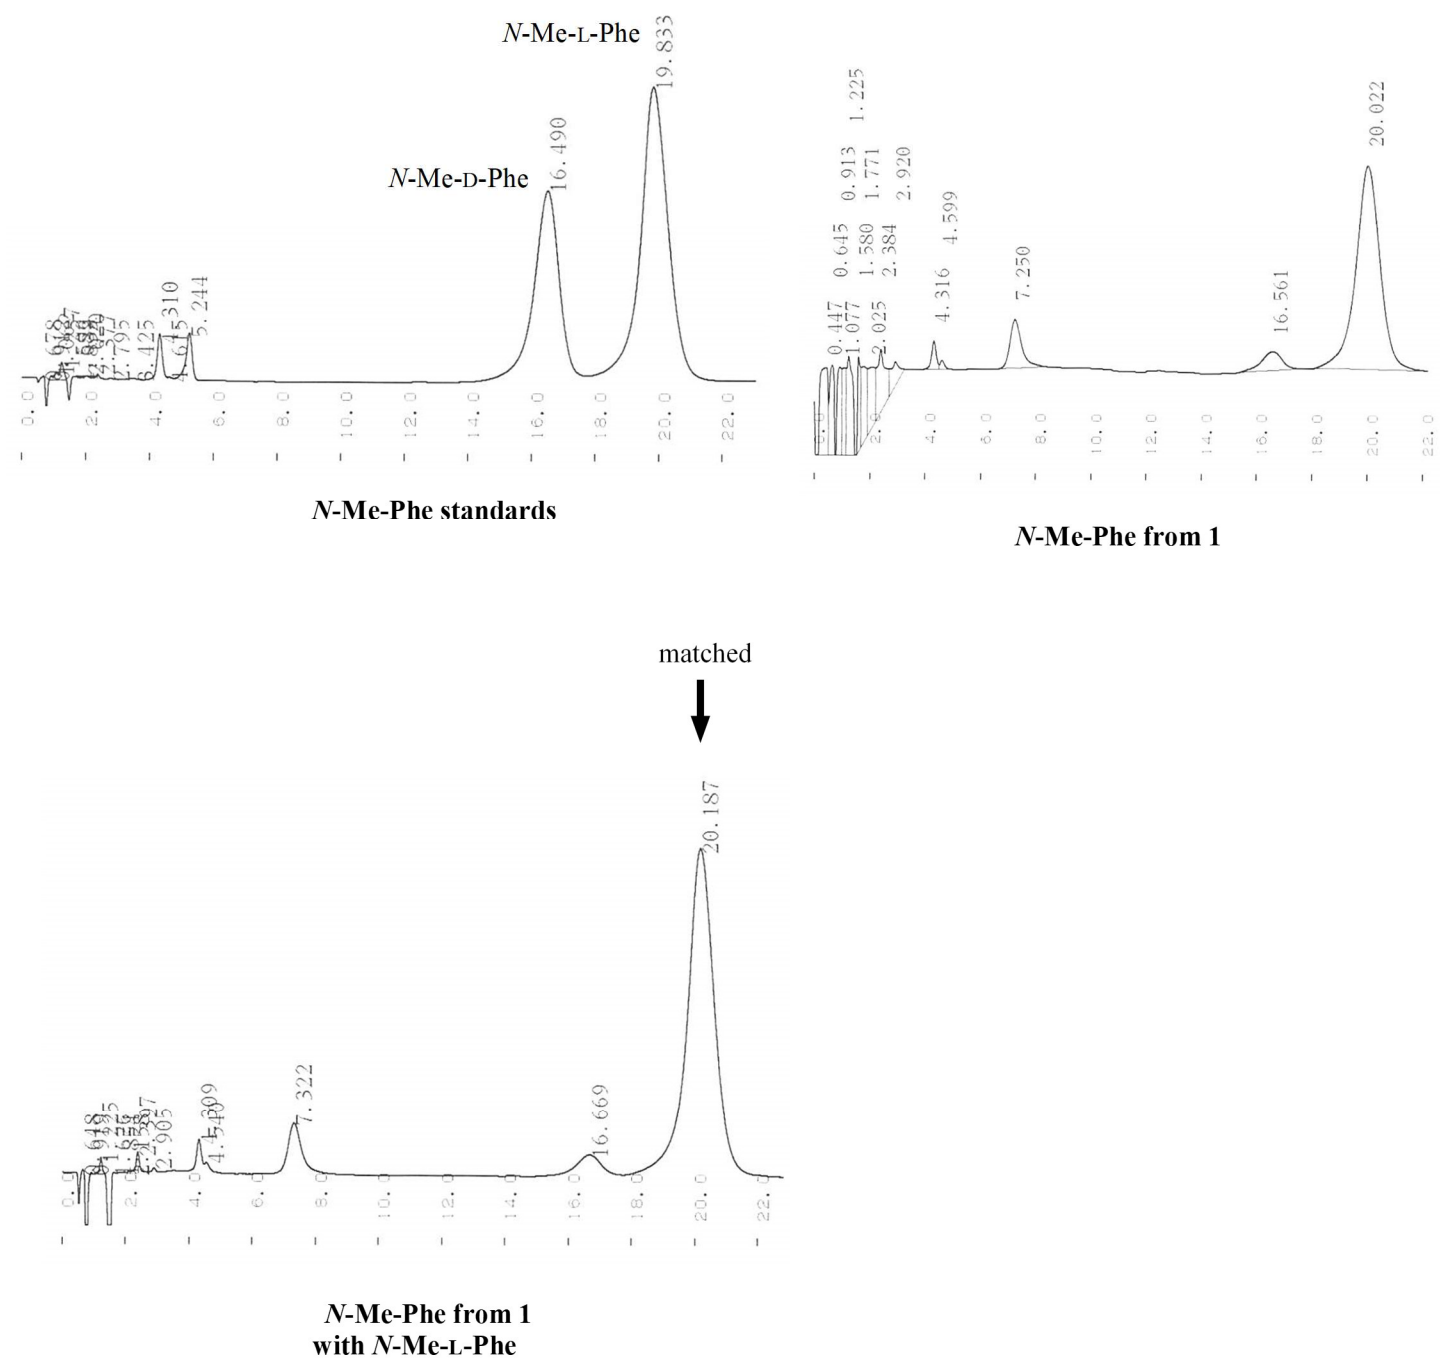

**Figure S21.** Chiral HPLC analysis of hydrosylates of **1** (N-Me-Phe).

N-Me-Phe: column, DAICEL CHIRALPAK MA(+) ( 4.6 × 50 mm); flow rate 1 mL/min; detection, UV 254 nm; solvent 2.0 mM CuSO<sub>4</sub>

*t<sub>R</sub>* (min): Authentic samples N-Me-D-Phe (16.5), N-Me-L-Phe (19.8)



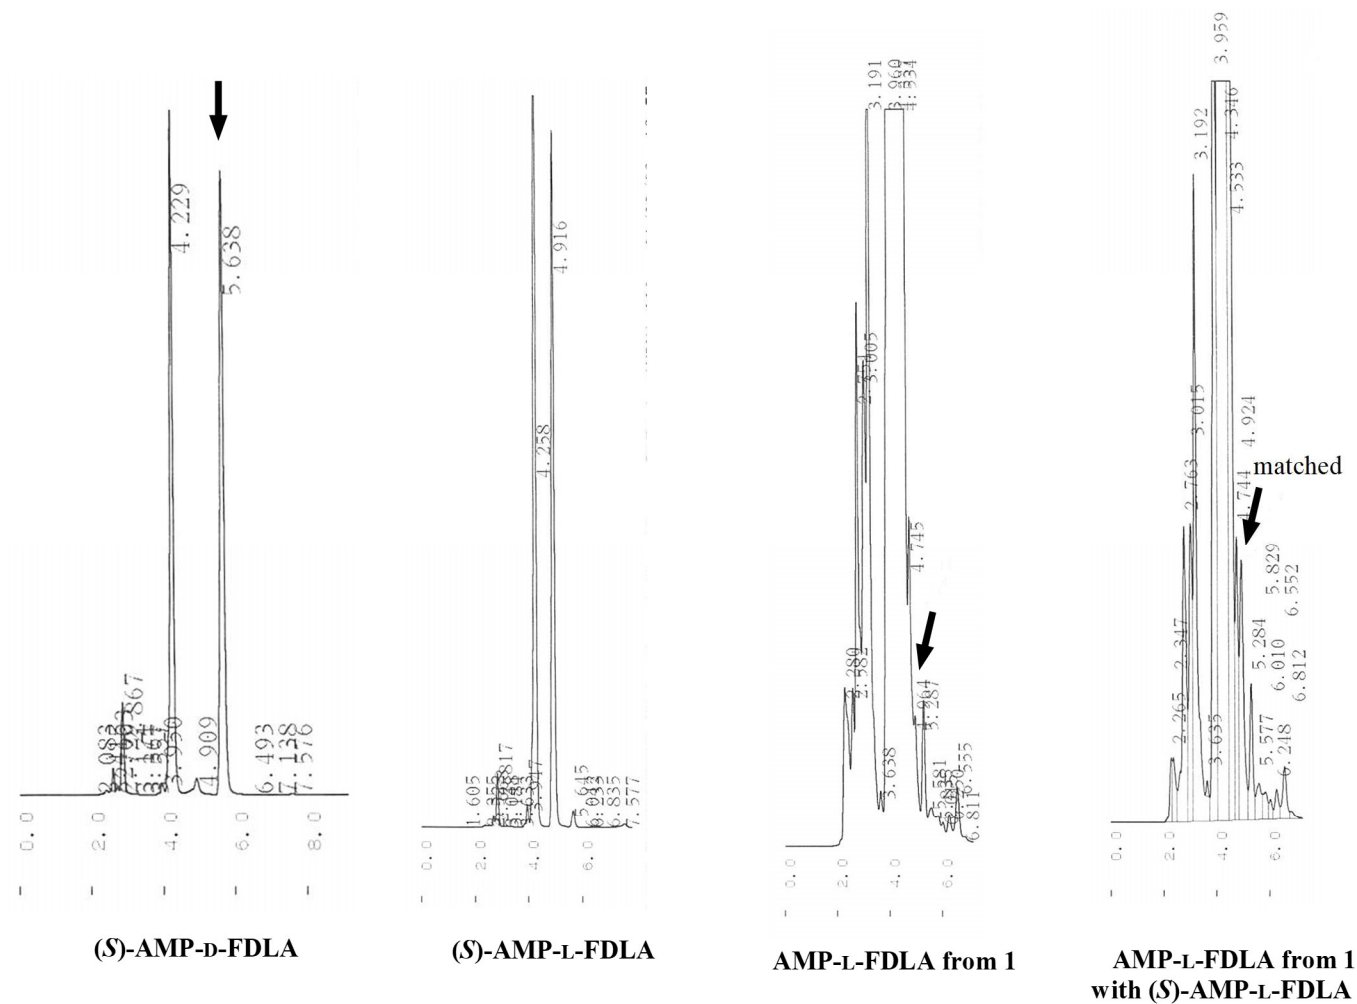

**Figure S22.** Chiral HPLC analysis of hydrosylates of **1** (AMP).

AMP: column, Cosmosil Cholester ( 4.6 × 250 mm); flow rate 1 mL/min; detection, UV 340 nm; solvent 70% aqueous MeCN, 0.1% TFA

$t_R$  (min): Authentic samples (S)-AMP-D-FDLA (5.6), (S)-AMP-L-FDLA (4.9)

A

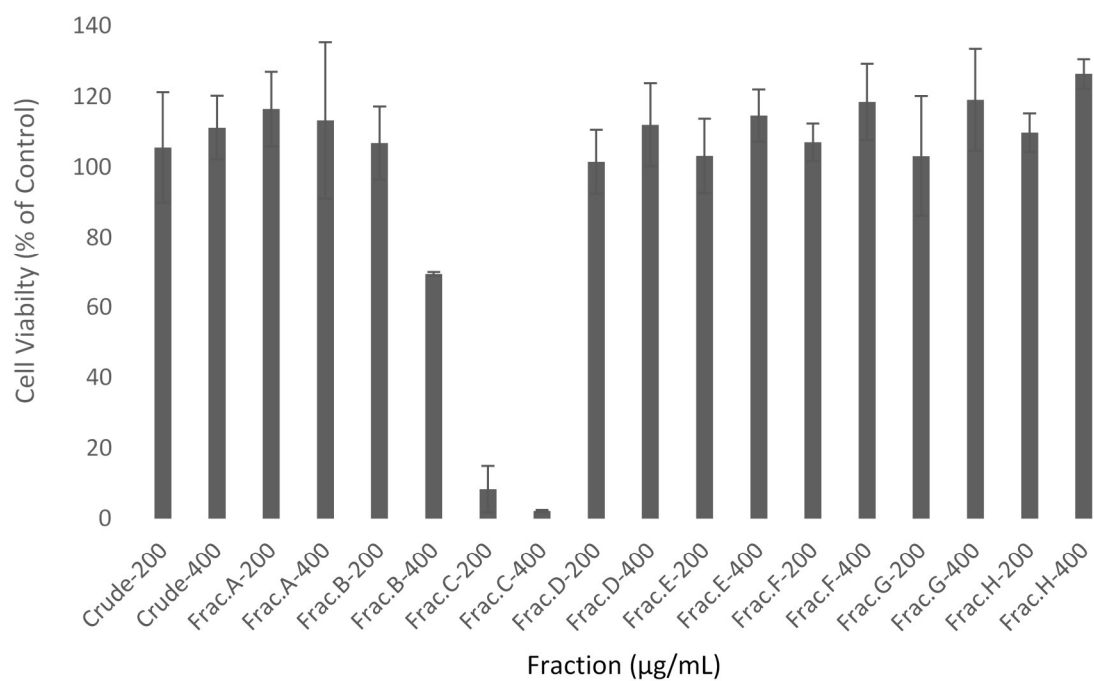

B

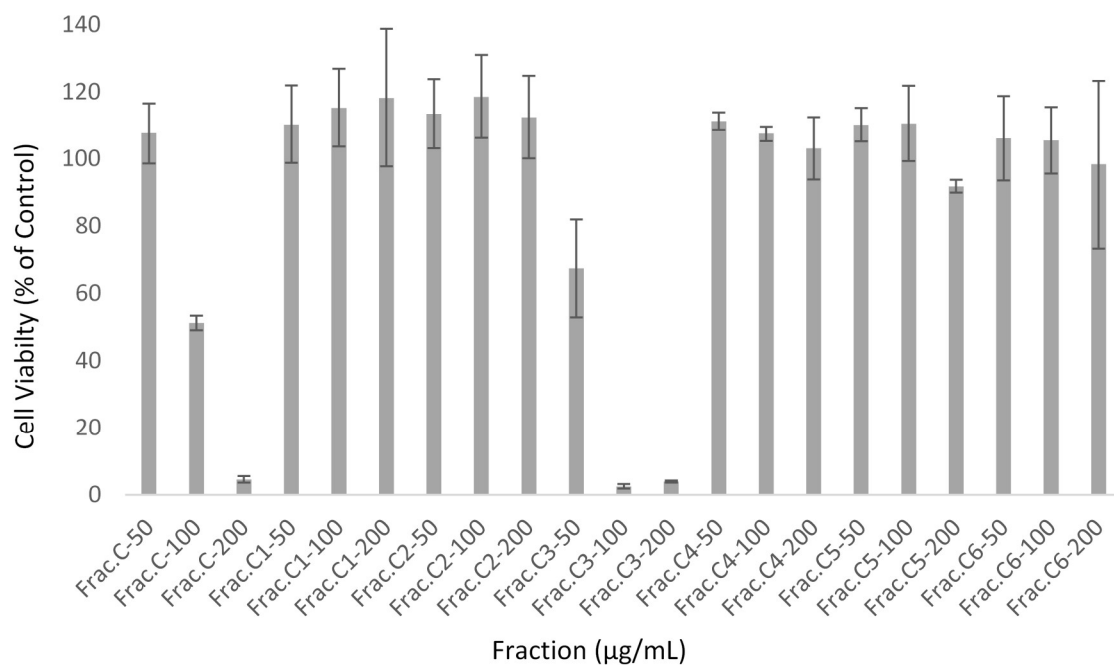

**Figure S23.** Bioactivity data used to guide fractionation of *cf. Neolyngbya* sp. extract using HCT116 human colorectal cancer cell viability *in vitro*.

Cells were untreated (control) and treated with (A) crude fractions or (B) sub-fractions for 24 h followed by cell viability assessment using XTT assay. Data represent the mean cell proliferation of three trials using the XTT assay, and bars represent the standard deviations.

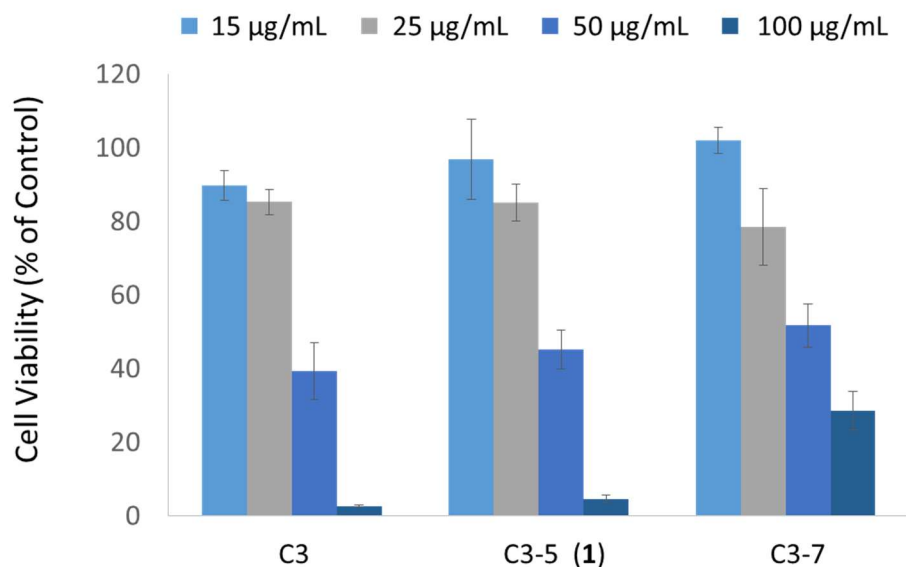

**Figure S24.** The *in vitro* effect of C3, C3-5 (compound 1), and C3-7 on HCT116 cells viability, following 24 h of treatment with escalating concentrations.

Cell viability assessment done using the XTT assay. Results are presented as the percentage of control untreated HCT116 cells. Error bars represent the standard deviations.

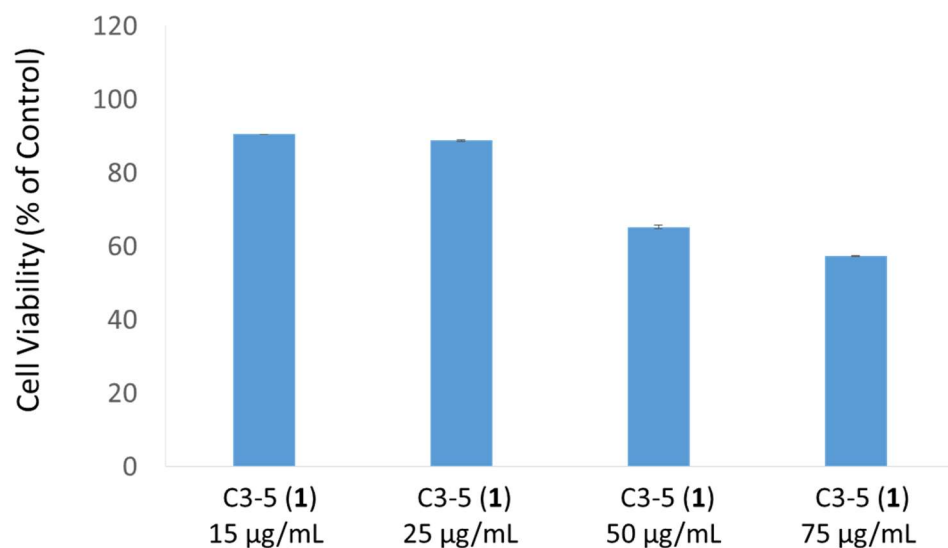

**Figure S25.** The *in vitro* effect of C3-5 (compound 1) on HCT116 cells viability, following 8 h of treatment with escalating concentrations.

Cell viability assessment of C3-5 using the XTT assay. Results are presented as the percentage of control untreated HCT116 cells. Error bars represent the standard deviations.

<https://gnps.ucsd.edu/ProteoSAFe/status.jsp?task=f62b23918fb24bca9f4a234f3555df50>

**Weblink S1.** GNPS metabolomics data used to prepare main text Figure 4.

<https://gnps.ucsd.edu/ProteoSAFe/status.jsp?task=0e36af9bc15d4d6c901292d5be8ff32b>

**Weblink S2.** GNPS metabolomics data used to prepare main text Figure 9.

UGGGGAAUUUCCGCAAUGGGCGAAGCCUGACGGAGCAAGACCGCGUGGGGGAGAAAGCCUUUGGGUUGUA  
AACCCCUUUUCUGGGAAGAGUGACGGUACCAGGAAUCAGCCUCGGCUAACUCCGUGCCAGCAGCCGCGGUA  
AUACGGAGGAGGCAGCGUUAUCCGGAUGAUUGGGCGUAAAGCGUCCGCAGGUGGAAGUCGUGUAAAACCA  
AGCUAACUGAGGGCAUGGAAACUGCUGAGUCGGUAGGGGCAGAGGGAAUCCUGGUGUAGCGGUGAAAUG  
CGUAGAGAUCAGGAAGAACACCGUGGCGAAAGCGCUCUGCUGGGCCACUGACACUCAGGGACGAAAGCUAG  
GGGAGCGAAUGGG

**Sequence S1.** 16S rRNA gene V3-V4 amplicon used to prepare main text Figure 3C.

This was the most prominent sequence obtained from the microbiome analysis of sample HAINAN-19SEP17-3.
